# Supplementary material for: A novel porous Ti/TiN/Ti thin film as a working electrode for back-contact, monolithic and non-TCO dye-sensitized solar cells
Source: Royal Society of Chemistry journal article supplement (doi:10.1039/c6se00118a), 2017-01-01
Supplement: c6se00118a1.pdf [file c6se00118a1.pdf]

## Supporting Information

# A Novel porous Ti/TiN/Ti thin film as working electrode for back-contact, monolithic and non-TCO dye-sensitized solar cells

Po-Shen Shen<sup>1</sup>, Ming-Hsien Li<sup>1</sup>, Yu-Syuan Yang<sup>1</sup>, Sean Sung-Yen Juang<sup>1</sup>, Chia-Wei Lin<sup>1</sup>, Tan-Ya Yin<sup>1</sup>, Peter Chen<sup>1,2,3,\*</sup>

<sup>1</sup>Department of Photonics

<sup>2</sup>Research Center for Energy Technology and Strategy (RCETS)

<sup>3</sup>Advanced Optoelectronic Technology Center (AOTC)

National Cheng Kung University, Tainan, Taiwan 701

Corresponding Author: [petercyc@mail.ncku.edu.tw](mailto:petercyc@mail.ncku.edu.tw)

Table S1. Summary of sheet resistivity and film thickness for sputtered TiN thin film under various nitrogen flows and Ti-TiN-Ti thin film.

|                                                    |  |  |  |  | Ti-TiN-Ti thin film |
|----------------------------------------------------|-------------------------------------------------------------------------------------|-------------------------------------------------------------------------------------|--------------------------------------------------------------------------------------|---------------------------------------------------------------------------------------|---------------------|
| N <sub>2</sub> / (Ar + N <sub>2</sub> ) flow ratio | 0.6/(0.6+30)                                                                        | 1.0/(1.0+30)                                                                        | 1.5/(1.5+30)                                                                         | 2.5/(2.5+30)                                                                          |                     |
| Sheet resistivity (Ω/□)                            | 2.38                                                                                | 4.10                                                                                | 5.27                                                                                 | 13.30                                                                                 | 7.74                |
| Film thickness (nm)                                | 560                                                                                 | 500                                                                                 | 450                                                                                  | 330                                                                                   | 450                 |

Table S2. Complete photovoltaic performances of BC-DSCs and Ref-DSCs using photoanodes with various thickness of TiO<sub>2</sub> layer sensitized with Z-907 dye and MK-2 dye, respectively.

|                   | TiO <sub>2</sub> Thickness (μm) | V <sub>OC</sub> (mV) | J <sub>SC</sub> (mA/cm <sup>2</sup> ) | FF   | PCE (%) |
|-------------------|---------------------------------|----------------------|---------------------------------------|------|---------|
| BC-DSCs<br>Z-907  | 2.3                             | 780                  | 3.13                                  | 0.71 | 1.73    |
|                   | 4.0                             | 740                  | 6.88                                  | 0.71 | 3.69    |
|                   | 8.8                             | 720                  | 8.25                                  | 0.70 | 4.17    |
|                   | 10.6                            | 720                  | 9.06                                  | 0.69 | 4.53    |
|                   | 14.8                            | 700                  | 8.07                                  | 0.68 | 3.90    |
| BC-DSCs<br>MK-2   | 2.3                             | 760                  | 6.50                                  | 0.72 | 3.55    |
|                   | 4.0                             | 740                  | 7.53                                  | 0.71 | 3.95    |
|                   | 8.8                             | 740                  | 7.88                                  | 0.71 | 4.16    |
|                   | 10.6                            | 720                  | 7.38                                  | 0.69 | 3.68    |
|                   | 14.8                            | 720                  | 6.74                                  | 0.68 | 3.29    |
|                   | TiO <sub>2</sub> Thickness (μm) | V <sub>OC</sub> (mV) | J <sub>SC</sub> (mA/cm <sup>2</sup> ) | FF   | PCE (%) |
| Ref-DSCs<br>Z-907 | 2.3                             | 780                  | 6.53                                  | 0.77 | 3.94    |
|                   | 4.0                             | 760                  | 8.58                                  | 0.74 | 4.8     |
|                   | 8.8                             | 760                  | 10.63                                 | 0.72 | 5.80    |
|                   | 10.6                            | 740                  | 11.25                                 | 0.72 | 6.0     |
|                   | 14.8                            | 740                  | 9.75                                  | 0.71 | 5.17    |
| Ref-DSCs<br>MK-2  | 2.3                             | 780                  | 7.44                                  | 0.71 | 4.11    |
|                   | 4.0                             | 760                  | 8.31                                  | 0.71 | 4.51    |
|                   | 8.8                             | 760                  | 10                                    | 0.70 | 5.36    |
|                   | 10.6                            | 740                  | 9.75                                  | 0.68 | 4.87    |
|                   | 14.8                            | 720                  | 8.81                                  | 0.66 | 4.17    |

Table S3. Photovoltaic parameters of BC-DSCs using 350 nm Ti-TiN-Ti electrode with Z-907 dye and MK-2 dye.

|                  | TiO <sub>2</sub> Thickness (μm) | V <sub>OC</sub> (mV) | J <sub>SC</sub> (mA/cm <sup>2</sup> ) | FF   | PCE (%) |
|------------------|---------------------------------|----------------------|---------------------------------------|------|---------|
| BC-DSCs<br>Z-907 | 11.3                            | 740                  | 5.39                                  | 0.64 | 2.58    |
| BC-DSCs<br>MK-2  | 9.0                             | 783                  | 5.71                                  | 0.68 | 3.04    |

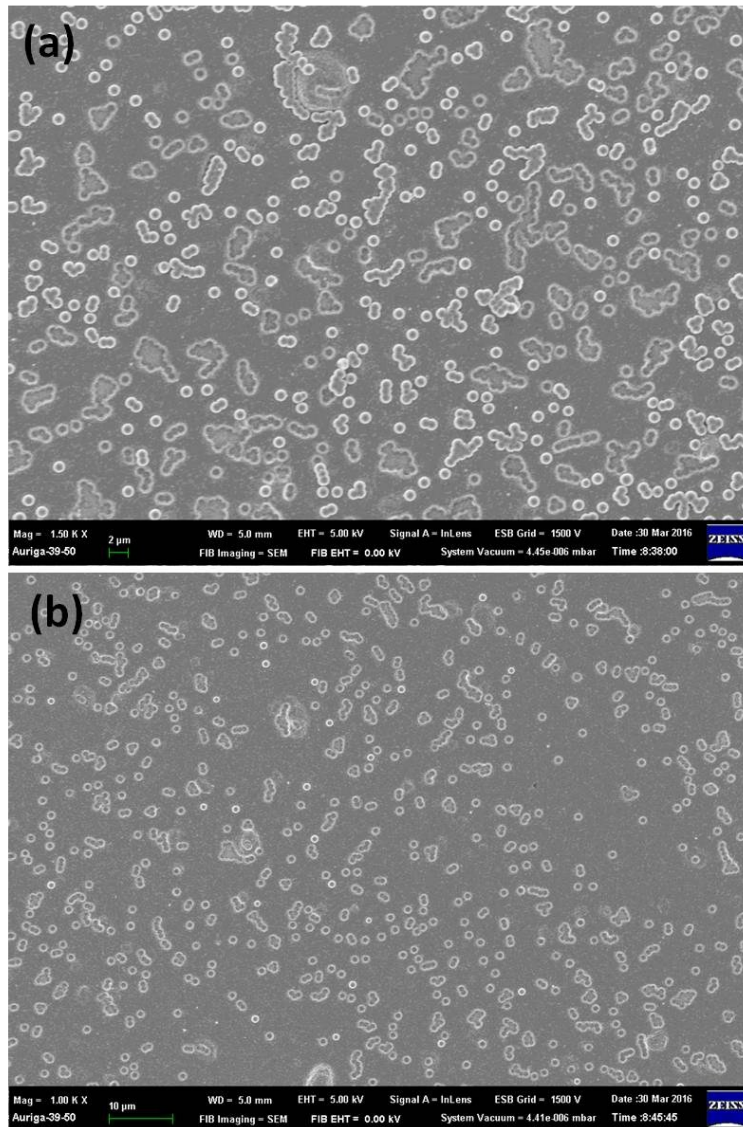

Figure S1. The SEM image for (a) incomplete and (b) complete removal of polystyrene balls

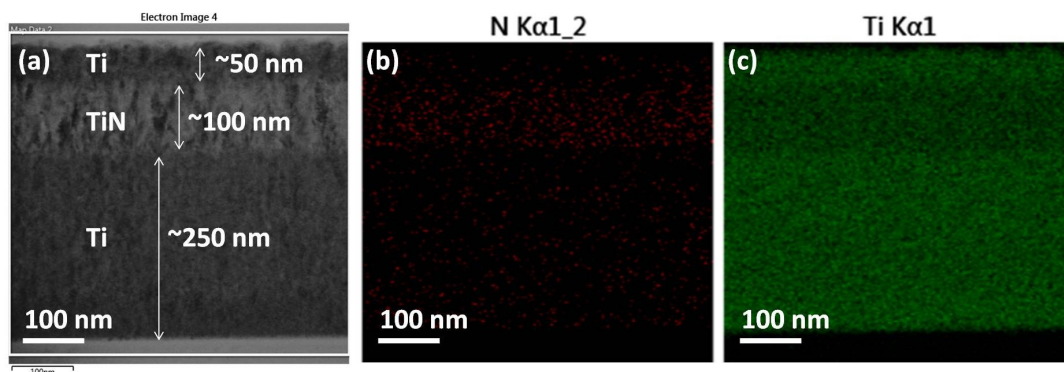

Figure S2. (a) Cross-sectional TEM image of Ti-TiN-Ti tri-layer deposited on glass substrate. Energy dispersive X-ray spectroscopy (EDX) mapping of relevant elements of (b) N, and (c) Ti for Ti-TiN-Ti tri-layer.

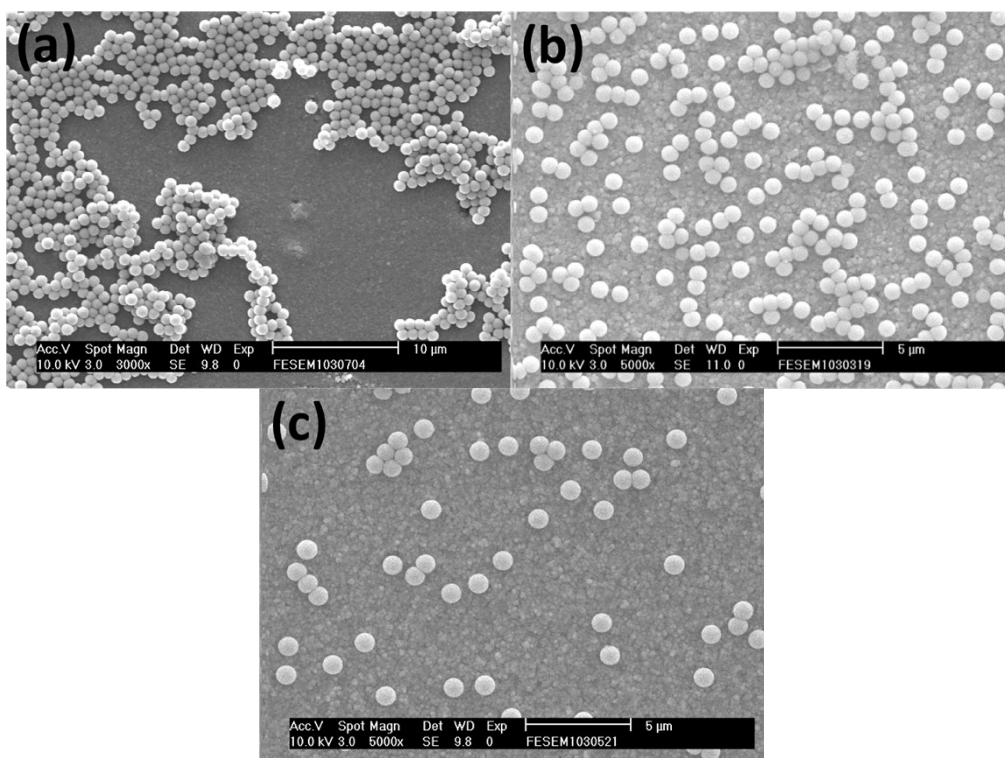

Figure S3. SEM images of polystyrene distributed on meso-TiO<sub>2</sub> layer after deposition of Ti-TiN-Ti thin films resulting from solution of (a) polystyrene:ethanol (1:50), (b) polystyrene:ethanol (1:99), and (c) polystyrene:ethanol (1:199).

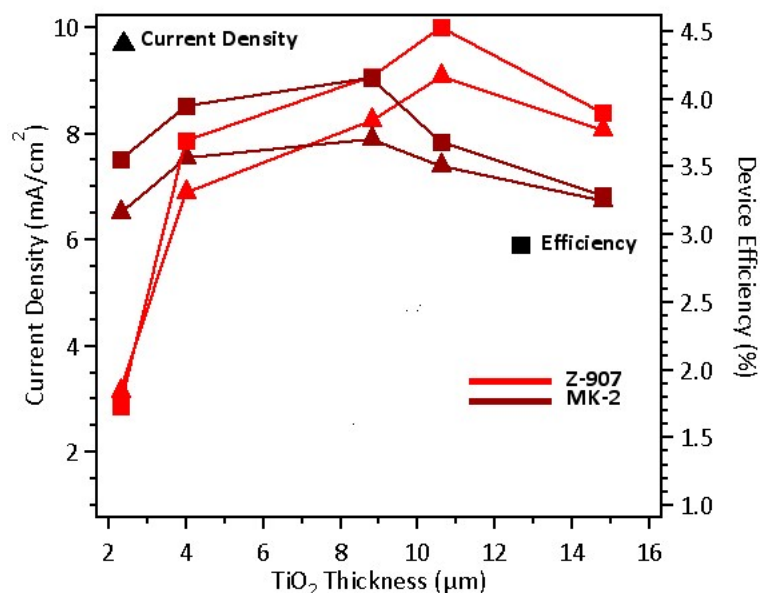

Figure S4. The dependence of TiO<sub>2</sub> layer thickness versus short-circuit current density and device efficiency for BC-DSCs sensitized with Z-907 dye and MK-2 dye.
